# Supplementary material for: Trends and variability in snowmelt in China under climate change
Source: Copernicus journal article supplement (doi:10.5194/hess-26-305-2022), 2022-01-24
Supplement: Supplementary file 1 [file hess-26-305-2022-supplement.zip]

Archive with 3 entries (3 files):
- hess-26-305-2022-supplement-title-page.pdf
- Supplement_snowcover_test.gif
- Supplement_Figures and Tables.docx
