# Supplementary material for: Trends and variability in snowmelt in China under climate change
Source: Copernicus journal article supplement (doi:10.5194/hess-26-305-2022), 2022-01-24
Supplement: Supplementary file 1 [file hess-26-305-2022-supplement.zip › hess-26-305-2022-supplement-title-page.pdf]

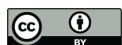

## *Supplement of*

# **Trends and variability in snowmelt in China under climate change**

**Yong Yang et al.**

*Correspondence to:* Rensheng Chen (crs2008@lzb.ac.cn)

- hess-26-305-2022-supplement-title-page.pdf
- Supplement\_Figures and Tables.docx
- Supplement\_snowcover\_test.gif

The copyright of individual parts of the supplement might differ from the article licence.
