# Supplementary figures and images for: Trends and variability in snowmelt in China under climate change
Source: Copernicus journal article supplement (doi:10.5194/hess-26-305-2022), 2022-01-24

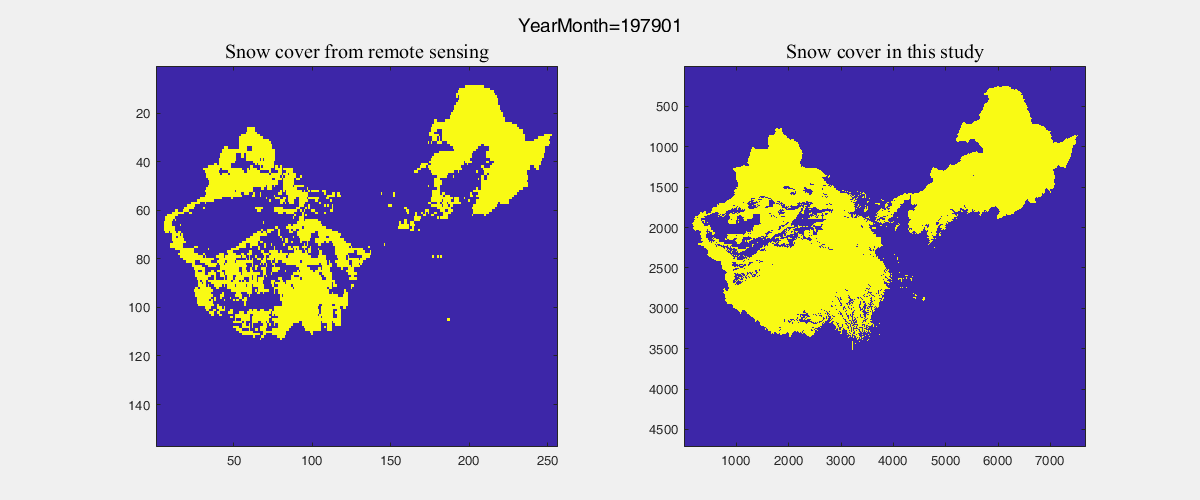

Supplement: Supplementary file 1 [file hess-26-305-2022-supplement.zip › Supplement_snowcover_test.gif]
